# Supplementary material
Source: ML conference proceedings conference paper supplement (https://openreview.net/forum?id=KQsR2JrCwx)
Supplement: supplementary_material [file Ablation.xlsx]

## Sheet: full data
Model	Param	FIGNEWS(English)		FIGNEWS(Arabic)		CRUD-RAG(Chinese)		FIGNEWS(French)		FIGNEWS(Hindi)		FIGNEWS(Hebrew)
		MRR@8	NDCG@8	MRR@8	NDCG@8	MRR@8	NDCG@8	MRR@8	NDCG@8	MRR@8	NDCG@8	MRR@8	NDCG@8
bge-m3	QAE\textsubscript{emb}, $\alpha=0.3$	76.23	79.96	80.03	82.64	88.74	90.62	74.99	78.47	60.94	65.85	78.85	81.72
	QAE\textsubscript{txt}, $\beta=1.5$	77.09	80.79	80.05	82.76	89	90.82	76.72	79.86	62.54	67.51	79.76	82.39
	QAE\textsubscript{hyb}, $\alpha=0.15,\;\beta=1.5$	77.26	80.72	80.57	83.25	89.39	91.16	76.35	79.65	61.49	66.3	79.65	82.38
	$n=10$	76.8	79.53	76.9	79.22	85.9	87.83	71.7	73.83	62.2	65.78	68	71.3
multilingual-e5-large	QAE\textsubscript{emb}, $\alpha=0.45$	77.83	81.1	79.72	82.65	89.73	91.42	76.97	79.94	58.16	63.07	78.03	80.94
	QAE\textsubscript{txt}, $\beta=1.5$	75.58	79	80.7	83.65	88.29	90.41	75.99	79.25	59.73	64.8	76.97	79.69
	QAE\textsubscript{hyb}, $\alpha=0.15,\;\beta=1.25$	77.01	80.45	82.1	84.85	89.11	91.06	77.22	80.42	60.29	65.05	77.6	80.64
	$n=10$	76.78	79.4	76.54	79.24	84.9	86.8	70.42	73.06	61.54	65.39	69.28	71.81
mContriever	QAE\textsubscript{emb}, $\alpha=0.6$	58.57	63.15	67.06	70.97	88.28	90.11	62.45	66.19	50.16	55.1	69.38	72.47
	QAE\textsubscript{txt}, $\beta=1.5$	48.65	52.8	59.32	63.33	79.93	83.09	53.69	57.7	44.87	49.63	60.63	64.17
	QAE\textsubscript{hyb}, $\alpha=0.45,\;\beta=1.25$	61.17	65.42	68.23	71.86	88.69	90.5	64.5	68.52	50.32	55.56	69.8	72.99
	$n=10$	72.79	75.53	71.78	74.57	83.7	85.79	65.18	67.97	57.26	60.83	67.39	70.16

## Sheet: paper data
Model	Param	FIGNEWS(English)		FIGNEWS(Arabic)		CRUD-RAG(Chinese)
		MRR@8	NDCG@8	MRR@8	NDCG@8	MRR@8	NDCG@8
bge-m3	QAE\textsubscript{emb}, $\alpha=0.3$	76.23	79.96	80.03	82.64	88.74	90.62
	QAE\textsubscript{txt}, $\beta=1.5$	77.09	80.79	80.05	82.76	89	90.82
	QAE\textsubscript{hyb}, $\alpha=0.15,\;\beta=1.5$	77.26	80.72	80.57	83.25	89.39	91.16
	$n=10$	76.8	79.53	76.9	79.22	85.9	87.83
multilingual-e5-large	QAE\textsubscript{emb}, $\alpha=0.45$	77.83	81.1	79.72	82.65	89.73	91.42
	QAE\textsubscript{txt}, $\beta=1.5$	75.58	79	80.7	83.65	88.29	90.41
	QAE\textsubscript{hyb}, $\alpha=0.15,\;\beta=1.25$	77.01	80.45	82.1	84.85	89.11	91.06
	$n=10$	76.78	79.4	76.54	79.24	84.9	86.8
mContriever	QAE\textsubscript{emb}, $\alpha=0.6$	58.57	63.15	67.06	70.97	88.28	90.11
	QAE\textsubscript{txt}, $\beta=1.5$	48.65	52.8	59.32	63.33	79.93	83.09
	QAE\textsubscript{hyb}, $\alpha=0.45,\;\beta=1.25$	61.17	65.42	68.23	71.86	88.69	90.5
	$n=10$	72.79	75.53	71.78	74.57	83.7	85.79
