# Supplementary material
Source: ML conference proceedings conference paper supplement (https://openreview.net/forum?id=KQsR2JrCwx)
Supplement: supplementary_material [file attachment]

## Sheet: raw data
model_name	params	MRR_1	MAP_1	NDCG_1	MRR_2	MAP_2	NDCG_2	MRR_3	MAP_3	NDCG_3	MRR_4	MAP_4	NDCG_4	MRR_5	MAP_5	NDCG_5	mean	sum
bge-base-en	\alpha=0.0	85.3	81.4	66.8	73.7	70.8	62.7	72.4	72.4	76.6	57.6	55.6	54.4	92.7	89.1	82.2	72.9	1093.6
bge-base-en	\alpha=0.3,\;\beta=0.75	86.2	82.5	67.6	79.4	76	69	76.3	76.3	80	58.3	56.1	55.9	92.9	89.2	81.8	75.2	1127.6
bge-base-en-v1-5	\alpha=0.0	86.8	83.2	68	74.5	71.4	63.7	74.5	74.5	78.7	57.2	55.1	54.4	93.7	90.5	83.2	74	1109.5
bge-base-en-v1-5	\alpha=0.15,\;\beta=0.75	86.6	83.2	68.2	78.5	75.6	68.4	78.2	78.2	82	58.6	56	56.2	94.1	90.9	83	75.8	1137.6
bge-large-en	\alpha=0.0	68.9	65.1	52.1	77.9	74.5	67.6	74.8	74.8	78.5	54.2	52.5	51.5	91.5	88.3	80.8	70.2	1053
bge-large-en	\alpha=0.3	78.5	74.1	59.5	79.8	76.8	69.7	76.3	76.3	80	57.3	55	54.6	92.2	88.5	81.8	73.4	1100.4
bge-large-en-v1-5	\alpha=0.0	87	83.2	68	78.4	75	67.5	76.2	76.2	79.9	57.7	55.8	55.8	93.4	90.1	83.3	75.2	1127.6
bge-large-en-v1-5	\alpha=0.15,\;\beta=0.5	88.2	84.2	69.1	80.2	77.5	70.3	78.2	78.2	81.8	59.1	56.7	57.3	94.2	91	83.5	76.6	1149.5
bge-m3	\alpha=0.0	84	79.6	64.7	76	73.4	65	79.2	79.2	82.6	54.4	52.8	52	94	91.1	82.5	74	1110.6
bge-m3	\alpha=0.15,\;\beta=0.5	84.3	80.5	64.9	77.5	74.7	67	79.8	79.8	83.1	55.3	53.3	52.6	92.9	89.4	81	74.4	1116
gte-base-en-v1-5	\alpha=0.0	86.2	82.5	67.6	77.7	74.8	67.2	68.1	68.1	72.4	54.5	52.5	51.6	93.4	89.7	78.4	72.3	1084.6
gte-base-en-v1-5	\alpha=0.3,\;\beta=0.5	85.5	81.6	67.4	78.8	76.1	69.2	74.8	74.8	78.7	57	54.8	55.1	92.9	88.9	76.9	74.2	1112.4
gte-large-en-v1-5	\alpha=0.0	86.1	82.2	68.5	79.8	76.9	70.2	73.7	73.7	77.9	55.1	53.2	53	93.6	89.8	78.2	74.1	1112
gte-large-en-v1-5	\alpha=0.3	86.6	82.6	68.7	81	77.8	71.5	74.6	74.6	78.7	56.8	54.8	54.3	93.2	89.9	77.2	74.8	1122.1
gte-multilingual-base	\alpha=0.0	87.3	82.7	68	78.4	75.6	68.3	81.7	81.7	85.1	56.7	54.4	54.1	92.1	87.8	77.3	75.4	1131.2
gte-multilingual-base	\beta=0.75	87.1	83.4	68.1	80.4	77.5	70.1	82.1	82.1	85.5	55.7	53.8	54.1	91.8	88.4	76.5	75.8	1136.6
jina-embeddings-v2-base-en	\alpha=0.0	84.8	80.5	65.5	76.8	74.5	66.4	75.4	75.4	79	54.4	52.8	51.8	92.9	89.5	81	73.4	1100.7
jina-embeddings-v2-base-en	\alpha=0.15	84.8	81	65.6	77.4	75.1	67.2	75.7	75.7	79.4	54.5	52.7	52.3	92.6	88.8	80.4	73.6	1103.3
jina-embeddings-v2-small-en	\alpha=0.0	82.4	79.3	63.3	74.6	72.7	64.4	69.5	69.5	73.6	54.3	52.4	51.6	92.9	88.3	78.1	71.1	1066.8
jina-embeddings-v2-small-en	\alpha=0.15,\;\beta=0.5	83.3	79.9	64.1	75.9	73.9	65.5	72.4	72.4	76.2	53.8	52.3	51.6	91.7	87.3	76.6	71.8	1077
multilingual-e5-base	\alpha=0.0	85	81.8	65.2	75.5	72.9	64.8	83.7	83.7	86.7	42.9	41.8	40.1	94.3	91.4	84.4	72.9	1094.2
multilingual-e5-base	\alpha=0.15	84.9	81.1	65.3	77.1	74	66.4	83.2	83.2	86.3	45	43.8	42.4	94.1	91.1	84.1	73.5	1102
multilingual-e5-large	\alpha=0.0	86	82.3	66.3	76.8	73.9	66.1	86.2	86.2	88.9	39	37.8	37.6	95.3	92.8	85.4	73.4	1100.7
multilingual-e5-large	\alpha=0.15,\;\beta=1.5	86.1	81.9	66.7	79.3	77	68.9	84.9	84.9	87.9	46.4	45.6	43.3	94.3	91	83.4	74.8	1121.7
text2vec-base-multilingual	\alpha=0.0	53.8	51.1	36.6	41.8	40.1	33.3	40.9	40.9	45.6	38.2	37	34.7	51.2	49	37.8	42.1	632
text2vec-base-multilingual	\alpha=0.6,\;\beta=0.5	66.6	63.7	47.2	57.2	55.5	47.1	56.2	56.2	60.6	43.4	42.1	40.8	72	69.2	52.7	55.4	830.4
contriever	\alpha=0.0	78.8	75	60.8	71.2	68.6	61.4	64.8	64.8	69.4	51.3	49.2	49.8	89	84.6	74.1	67.5	1012.8
contriever	\alpha=0.45	84	80.2	65.7	76.4	73.9	67.4	74.9	74.9	78.9	55.7	54	54.4	89.8	86.2	75.1	72.8	1091.3
mcontriever	\alpha=0.0	52.1	48.7	37.6	59.4	56.8	49.7	49.3	49.3	54.9	43	41.2	40.6	83	78.3	67.9	54.1	811.9
mcontriever	\alpha=0.45,\;\beta=0.75	61.4	58.5	45.9	70.4	67.6	60.4	64.7	64.7	69.5	51	49.1	48.3	85.2	80.9	69.5	63.1	947.2
bce-embedding-base-v1	\alpha=0.0	74.4	70	55.5	67.8	65.2	57.3	77.2	77.2	81.3	47.3	46.1	45	83	79.2	67.8	66.3	994.3
bce-embedding-base-v1	\alpha=0.3	76.4	72.3	56.8	69.4	66.5	58.4	77.1	77.1	81.1	50.1	48.4	48.4	84.1	79.7	68	67.6	1013.7

## Sheet: full data
Model	Param	NQ			SQuAD			ELI5			HotPotQA			MSMARCO			TriviaQA
		MRR@8	MAP@8	NDCG@8	MRR@8	MAP@8	NDCG@8	MRR@8	MAP@8	NDCG@8	MRR@8	MAP@8	NDCG@8	MRR@8	MAP@8	NDCG@8	MRR@8	MAP@8	NDCG@8
Sparse
BM25	-	17.9401	10.355	12.7815	46.2109	46.2115	48.2101	12.6298	9.5505	11.5343	13.8215	9.8626	11.092	53.2	53.1	62.1	9.834	6.6815	7.8272
Doc2Query	-	18.1568	10.9082	13.6463	45.4611	45.4611	48.1549	12.6157	9.7374	11.8004	13.3078	9.5859	10.9434	54.4	54.4	64	10.0974	7.0233	8.3198
DeepImpact	-	21.8254	12.8983	15.6548	47.7745	47.8597	49.9676	12.8503	9.9293	11.8828	14.4473	10.3674	11.5752	64.4	64.1	71.8	11.7765	8.2438	9.458
Dense
bge-large-en-v1.5	-	87	83.2	68	76.2	76.2	79.9	57.7	55.8	55.8	93.4	90.1	83.3	75.4	75.4	81.3	78.4	75	67.5
	QAE\textsubscript{hyb}, $\alpha=0.15,\;\beta=0.5$	88.2	84.2	69.1	78.2	78.2	81.8	59.1	56.7	57.3	94.2	91	83.5	73.8	73.8	79.9	80.2	77.5	70.3
multilingual-e5-large	-	86	82.3	66.3	86.2	86.2	88.9	39	37.8	37.6	95.3	92.8	85.4	73.6	73.6	80	76.8	73.9	66.1
	QAE\textsubscript{hyb}, $\alpha=0.15,\;\beta=1.5$	86.1	81.9	66.7	84.9	84.9	87.9	46.4	45.6	43.3	94.3	91	83.4	70.1	70.1	77.3	79.3	77	68.9
gte-base-en-v1.5	-	86.2	82.5	67.6	68.1	68.1	72.4	54.5	52.5	51.6	93.4	89.7	78.4	76.9	76.9	82.4	77.7	74.8	67.2
	QAE\textsubscript{hyb}, $\alpha=0.3,\;\beta=0.5$	85.5	81.6	67.4	74.8	74.8	78.7	57	54.8	55.1	92.9	88.9	76.9	76	76	81.4	78.8	76.1	69.2
jina-embeddings-v2-small-en	-	82.4	79.3	63.3	69.5	69.5	73.6	54.3	52.4	51.6	92.9	88.3	78.1	65.3	65.3	73.3	74.6	72.7	64.4
	QAE\textsubscript{hyb}, $\alpha=0.15,\;\beta=0.5$	83.3	79.9	64.1	72.4	72.4	76.2	53.8	52.3	51.6	91.7	87.3	76.6	68.2	68.2	75.7	75.9	73.9	65.5
contriever	-	78.8	75	60.8	64.8	64.8	69.4	51.3	49.2	49.8	89	84.6	74.1	55.4	55.4	63.6	71.2	68.6	61.4
	QAE\textsubscript{emb}, $\alpha=0.45$	84	80.2	65.7	74.9	74.9	78.9	55.7	54	54.4	89.8	86.2	75.1	67.1	67.1	74.2	76.4	73.9	67.4
mcontriever	-	52.1	48.7	37.6	49.3	49.3	54.9	43	41.2	40.6	83	78.3	67.9	49.6	49.6	56.7	59.4	56.8	49.7
	QAE\textsubscript{hyb}, $\alpha=0.45,\;\beta=0.75$	61.4	58.5	45.9	64.7	64.7	69.5	51	49.1	48.3	85.2	80.9	69.5	65.1	65.1	71.8	70.4	67.6	60.4
bce-embedding-base-v1	-	74.4	70	55.5	77.2	77.2	81.3	47.3	46.1	45	83	79.2	67.8	70.9	70.9	77.7	67.8	65.2	57.3
	QAE\textsubscript{emb}, $\alpha=0.3$	76.4	72.3	56.8	77.1	77.1	81.1	50.1	48.4	48.4	84.1	79.7	68	71.2	71.2	78	69.4	66.5	58.4
text2vec-base-multilingual	-	53.8	51.1	36.6	40.9	40.9	45.6	38.2	37	34.7	51.2	49	37.8	52.4	52.4	59.8	41.8	40.1	33.3
	QAE\textsubscript{hyb}, $\alpha=0.6,\;\beta=0.5$	66.6	63.7	47.2	56.2	56.2	60.6	43.4	42.1	40.8	72	69.2	52.7	67.8	67.8	74.2	57.2	55.5	47.1

## Sheet: paper data
Model	Param	NQ		SQuAD		ELI5
		MRR@8	NDCG@8	MRR@8	NDCG@8	MRR@8	NDCG@8
Sparse
BM25	-	17.9401	12.7815	46.2109	48.2101	12.6298	11.5343
Doc2Query	-	18.1568	13.6463	45.4611	48.1549	12.6157	11.8004
DeepImpact	-	21.8254	15.6548	47.7745	49.9676	12.8503	11.8828
Dense
bge-large-en-v1.5	-	87	68	76.2	79.9	57.7	55.8
	QAE\textsubscript{hyb}, $\alpha=0.15,\;\beta=0.5$	88.2	69.1	78.2	81.8	59.1	57.3
multilingual-e5-large	-	86	66.3	86.2	88.9	39	37.6
	QAE\textsubscript{hyb}, $\alpha=0.15,\;\beta=1.5$	86.1	66.7	84.9	87.9	46.4	43.3
gte-base-en-v1.5	-	86.2	67.6	68.1	72.4	54.5	51.6
	QAE\textsubscript{hyb}, $\alpha=0.3,\;\beta=0.5$	85.5	67.4	74.8	78.7	57	55.1
jina-embeddings-v2-small-en	-	82.4	63.3	69.5	73.6	54.3	51.6
	QAE\textsubscript{hyb}, $\alpha=0.15,\;\beta=0.5$	83.3	64.1	72.4	76.2	53.8	51.6
contriever	-	78.8	60.8	64.8	69.4	51.3	49.8
	QAE\textsubscript{emb}, $\alpha=0.45$	84	65.7	74.9	78.9	55.7	54.4
mcontriever	-	52.1	37.6	49.3	54.9	43	40.6
	QAE\textsubscript{hyb}, $\alpha=0.45,\;\beta=0.75$	61.4	45.9	64.7	69.5	51	48.3
bce-embedding-base-v1	-	74.4	55.5	77.2	81.3	47.3	45
	QAE\textsubscript{emb}, $\alpha=0.3$	76.4	56.8	77.1	81.1	50.1	48.4
text2vec-base-multilingual	-	53.8	36.6	40.9	45.6	38.2	34.7
	QAE\textsubscript{hyb}, $\alpha=0.6,\;\beta=0.5$	66.6	47.2	56.2	60.6	43.4	40.8
