# Supplementary material
Source: ML conference proceedings conference paper supplement (https://openreview.net/forum?id=KQsR2JrCwx)
Supplement: supplementary_material [file Discussion.xlsx]

## Sheet: data
Model	Param	FIGNEWS(English)		FIGNEWS(Arabic)		CRUD-RAG(Chinese)		FIGNEWS(French)		FIGNEWS(Hindi)		FIGNEWS(Hebrew)
		MRR@8	NDCG@8	MRR@8	NDCG@8	MRR@8	NDCG@8	MRR@8	NDCG@8	MRR@8	NDCG@8	MRR@8	NDCG@8
mContriever-msmarco	-	65.85	69.98	70.1	73.5	85.04	87.39	66.34	70.02	48.57	53.5	69.26	72.63
	QAE\textsubscript{hyb}, $\alpha=0.3,\;\beta=0.75$	72.07	76.29	77.24	80.22	88.61	90.61	74.23	77.66	58.73	63.46	76.33	79.44
multilingual-e5-large-instruct	-	66.73	70.66	74.94	78.12	79.79	82.46	65.75	70.12	47.95	53.14	69.45	72.82
	QAE\textsubscript{hyb}, $\alpha=0.15,\;\beta=1.5$	75.51	79.39	80.7	83.49	88.85	90.63	75.73	79.22	58.94	64.1	79.3	82.07
mContriever	-	32.8	36.33	40.07	44.15	71.69	75.78	34.68	38.55	26.85	31.37	49.22	53.67
	HyDE,$n=8$	24.85	27.56	35.14	40.41	70.73	74.17	25.64	28.56	11.64	14.31	41.79	46.96
multilingual-e5-large	-	73.75	77.54	76.55	79.87	85.71	88.15	70.36	73.97	52.72	58.35	73.85	77.14
	HyDE,$n=8$	63.39	67.72	68.15	73.82	81.52	83.85	58.19	62.61	45.49	51.04	65.26	69.56
