# Supplementary material
Source: ML conference proceedings conference paper supplement (https://openreview.net/forum?id=KQsR2JrCwx)
Supplement: supplementary_material [file Experiment1_Ablation.xlsx]

## Sheet: Sheet1
	Model	Param	NQ			SQuAD			ELI5			HotPotQA			MSMARCO			TriviaQA
			MRR@8	MAP@8	NDCG@8	MRR@8	MAP@8	NDCG@8	MRR@8	MAP@8	NDCG@8	MRR@8	MAP@8	NDCG@8	MRR@8	MAP@8	NDCG@8	MRR@8	MAP@8	NDCG@8
	Sparse
	BM25	-	17.9401	10.355	12.7815	46.2109	46.2115	48.2101	12.6298	9.5505	11.5343	13.8215	9.8626	11.092	53.2	53.1	62.1	9.834	6.6815	7.8272
	Doc2Query	-	18.1568	10.9082	13.6463	45.4611	45.4611	48.1549	12.6157	9.7374	11.8004	13.3078	9.5859	10.9434	54.4	54.4	64	10.0974	7.0233	8.3198
	DeepImpact	-	21.8254	12.8983	15.6548	47.7745	47.8597	49.9676	12.8503	9.9293	11.8828	14.4473	10.3674	11.5752	64.4	64.1	71.8	11.7765	8.2438	9.458
	Dense
	bge-large-en-v1.5	-	87	83.2	68	76.2	76.2	79.9	57.7	55.8	55.8	93.4	90.1	83.3	75.4	75.4	81.3	78.4	75	67.5
		$\alpha=0.3$	87.38	83.31	68.18	77.96	77.96	81.55	59.2	56.94	57.03	93.6	90.28	83.07	74.7	74.7	80.5	79.44	76.43	69.41
		$\beta=0.5$	88.12	84.33	68.93	77.61	77.61	81.46	58.09	55.92	56.57	94.22	90.96	83.63	73	73	79.5	80.1	77.23	69.95
		$\alpha=0.15,\;\beta=0.5$	88.2	84.2	69.1	78.2	78.2	81.8	59.1	56.7	57.3	94.2	91	83.5	73.8	73.8	79.9	80.2	77.5	70.3
	multilingual-e5-large	-	86	82.3	66.3	86.2	86.2	88.9	39	37.8	37.6	95.3	92.8	85.4	73.6	73.6	80	76.8	73.9	66.1
		$\alpha=0.3$	87	82.86	66.93	85.32	85.32	87.97	44.76	43.47	42.63	94.77	92.24	84.51	69.9	69.9	77.2	78.5	75.73	67.64
		$\beta=1.5$	86.11	82.17	66.54	84.46	84.46	87.54	45.21	44.13	42.2	94.86	91.52	83.97	69.7	69.7	77	79.57	77.26	68.96
		$\alpha=0.15,\;\beta=1.5$	86.1	81.9	66.7	84.9	84.9	87.9	46.4	45.6	43.3	94.3	91	83.4	70.1	70.1	77.3	79.3	77	68.9
	gte-base-en-v1.5	-	86.2	82.5	67.6	68.1	68.1	72.4	54.5	52.5	51.6	93.4	89.7	78.4	76.9	76.9	82.4	77.7	74.8	67.2
		$\alpha=0.3$	85.88	82.18	67.87	72.41	72.41	76.33	56.72	54.28	54.36	92.57	88.99	77.02	77.2	77.2	82.3	78.64	76.04	68.77
		$\beta=0.5$	85.33	81.27	67.02	73	73	77.22	55.57	53.37	53.41	93.33	89.98	77.71	76.7	76.7	82.3	78.62	75.8	68.7
		$\alpha=0.3,\;\beta=0.5$	85.5	81.6	67.4	74.8	74.8	78.7	57	54.8	55.1	92.9	88.9	76.9	76	76	81.4	78.8	76.1	69.2
	jina-embeddings-v2-small-en	-	82.4	79.3	63.3	69.5	69.5	73.6	54.3	52.4	51.6	92.9	88.3	78.1	65.3	65.3	73.3	74.6	72.7	64.4
		$\alpha=0.3$	82.97	79.46	63.53	71.2	71.2	75.22	54.58	52.71	52.08	91.53	87.11	76.35	65.3	65.3	73.5	76.19	74.02	65.61
		$\beta=0.5$	82.82	79.61	63.81	71.47	71.47	75.28	53.5	51.9	51.13	92.14	87.6	77.31	69.4	69.4	76.6	75.58	73.44	65.16
		$\alpha=0.15,\;\beta=0.5$	83.3	79.9	64.1	72.4	72.4	76.2	53.8	52.3	51.6	91.7	87.3	76.6	68.2	68.2	75.7	75.9	73.9	65.5
	contriever	-	78.8	75	60.8	64.8	64.8	69.4	51.3	49.2	49.8	89	84.6	74.1	55.4	55.4	63.6	71.2	68.6	61.4
		$\alpha=0.45$	84	80.2	65.7	74.9	74.9	78.9	55.7	54	54.4	89.8	86.2	75.1	67.1	67.1	74.2	76.4	73.9	67.4
		$\beta=1.25$	79.7	76.47	61.04	64.35	64.35	69.11	49.97	48.37	47.71	91.48	87.04	76.59	64	64	71.7	70.22	67.57	59.25
		$\alpha=0.45,\;\beta=0.5$	84.04	80.29	65.47	72.47	72.47	76.96	55.06	53.26	53.78	89.74	85.24	75.08	67	67	73.6	75.42	72.57	65.64
	mcontriever	-	52.1	48.7	37.6	49.3	49.3	54.9	43	41.2	40.6	83	78.3	67.9	49.6	49.6	56.7	59.4	56.8	49.7
		$\alpha=0.45$	62.13	59.28	46.54	63.57	63.57	68.63	49.18	47.5	47.23	85.71	81.45	70.38	64.5	64.5	71.8	70.07	67.08	60.25
		$\beta=0.75$	58.3	50.95	38.43	53.78	53.78	58.72	42.08	40.18	39.37	86.24	81.92	70.09	58.3	58.3	66	62.01	59.61	51.91
		$\alpha=0.45,\;\beta=0.75$	61.4	58.5	45.9	64.7	64.7	69.5	51	49.1	48.3	85.2	80.9	69.5	65.1	65.1	71.8	70.4	67.6	60.4
	bce-embedding-base-v1	-	74.4	70	55.5	77.2	77.2	81.3	47.3	46.1	45	83	79.2	67.8	70.9	70.9	77.7	67.8	65.2	57.3
		$\alpha=0.3$	76.4	72.3	56.8	77.1	77.1	81.1	50.1	48.4	48.4	84.1	79.7	68	71.2	71.2	78	69.4	66.5	58.4
		$\beta=0.5$	74.97	70.48	55.67	72.55	72.55	77.17	49.75	47.64	47.66	82.13	77.47	65.89	72.8	72.8	79.2	68.66	65.73	57.97
		$\alpha=0.3,\;\beta=0.5$	76.9	72.84	57.17	73.68	73.68	77.87	51.38	49.28	49.4	82.26	77.45	65.72	69.9	69.9	76.9	69.71	66.4	58.74
	text2vec-base-multilingual	-	53.8	51.1	36.6	40.9	40.9	45.6	38.2	37	34.7	51.2	49	37.8	52.4	52.4	59.8	41.8	40.1	33.3
		$\alpha=0.75$	66.68	63.47	47.41	54.75	54.75	59.34	42.93	41.65	40.67	71.8	69.05	52.75	69.1	69.1	75.4	57.84	56.12	47.62
		$\beta=0.5$	56.63	54.12	40.06	46.51	46.51	51.31	38.99	37.89	36.18	61.25	59.24	45.19	57.2	57.2	64.7	47.02	45.45	38.18
		$\alpha=0.6,\;\beta=0.5$	66.6	63.7	47.2	56.2	56.2	60.6	43.4	42.1	40.8	72	69.2	52.7	67.8	67.8	74.2	57.2	55.5	47.1
