# Supplementary material
Source: ML conference proceedings conference paper supplement (https://openreview.net/forum?id=KQsR2JrCwx)
Supplement: supplementary_material [file Experiment2.xlsx]

## Sheet: raw data
model_name	params	MRR_figEnglish	NDCG_figEnglish	MRR_figArabic	NDCG_figArabic	MRR_crud	NDCG_crud	MRR_figFrench	NDCG_figFrench	MRR_figHindi	NDCG_figHindi	MRR_figHebrew	NDCG_figHebrew
bge-m3	$\alpha=0.0$	74.3	78.2	77.7	80.5	86.8	88.9	73.4	76.9	58.4	63.8	78.6	81
bge-m3	$\beta=1.5$	77.1	80.8	80	82.8	89	90.8	76.7	79.9	62.5	67.5	79.8	82.4
multilingual-e5-small	-	70.9	74.7	74	77.1	81.7	84.2	72.8	76.1	66.6	70.1	52.3	57.2
multilingual-e5-small	$\alpha=0.3,\;\beta=0.5$	73.5	77.5	78.8	81.2	89.1	90.6	77.4	80.1	74.1	77.6	59.4	64
multilingual-e5-base	$\alpha=0.0$	74.7	77.9	72.2	75.7	86.1	88.1	70.9	74.3	57.6	62.4	72.6	75.6
multilingual-e5-base	$\alpha=0.3$	77.4	80.7	77.1	80	88.5	90.5	76.6	79.8	61.3	66	77.7	80.4
multilingual-e5-large	$\alpha=0.0$	73.8	77.5	76.6	79.9	85.7	88.1	70.4	74	52.7	58.4	73.9	77.1
multilingual-e5-large	$\alpha=0.15,\;\beta=1.25$	77	80.4	82.1	84.9	89.1	91.1	77.2	80.4	60.3	65	77.6	80.6
gte-multilingual-base	$\alpha=0.0$	65.3	69.9	73.2	76.2	82.9	85.6	62.8	67	52.1	57.8	65.9	69.3
gte-multilingual-base	$\alpha=0.15,\;\beta=1.5$	75.3	79	76.2	79	85.5	88	66.6	70.7	55.8	61.4	73.9	77.2
mcontriever	$\alpha=0.0$	32.8	36.3	40.1	44.2	71.7	75.8	34.7	38.6	26.8	31.4	49.2	53.7
mcontriever	$\alpha=0.45,\;\beta=1.25$	61.2	65.4	68.2	71.9	88.7	90.5	64.5	68.5	50.3	55.6	69.8	73
bce-embedding-base-v1	$\alpha=0.0$	58.9	63.3	-	-	76.8	80.3	-	-	-	-	-	-
bce-embedding-base-v1	$\alpha=0.3,\;\beta=0.5$	66.6	70.6	-	-	85.9	88.1	-	-	-	-	-	-
text2vec-base-multilingual	$\alpha=0.0$	38.5	43	27.7	31.4	12.1	13.7	33.2	37.5	15.3	18.9	12.3	14.6
text2vec-base-multilingual	$\alpha=0.75$	55.2	59.3	51.3	54.8	55.3	58.6	49.1	53.8	35.9	40.6	46.7	51

## Sheet: full data
Model	Param	FIGNEWS(English)		FIGNEWS(Arabic)		CRUD-RAG(Chinese)		FIGNEWS(French)		FIGNEWS(Hindi)		FIGNEWS(Hebrew)
		MRR@8	NDCG@8	MRR@8	NDCG@8	MRR@8	NDCG@8	MRR@8	NDCG@8	MRR@8	NDCG@8	MRR@8	NDCG@8
bge-m3	-	74.3	78.2	77.7	80.5	86.8	88.9	73.4	76.9	58.4	63.8	78.6	81
	QAE\textsubscript{txt}, $\beta=1.5$	77.1	80.8	80	82.8	89	90.8	76.7	79.9	62.5	67.5	79.8	82.4
multilingual-e5-small	-	70.9	74.7	74	77.1	81.7	84.2	72.8	76.1	66.6	70.1	52.3	57.2
	QAE\textsubscript{hyb}, $\alpha=0.3,\;\beta=0.5$	74.43	78.17	78.78	81.23	87.43	89.22	74.11	77.55	59.43	64.02	77.35	80.09
multilingual-e5-base	-	74.7	77.9	72.2	75.7	86.1	88.1	70.9	74.3	57.6	62.4	72.6	75.6
multilingual-e5-base	QAE\textsubscript{emb}, $\alpha=0.3$	77.4	80.7	77.1	80	88.5	90.5	76.6	79.8	61.3	66	77.7	80.4
multilingual-e5-large	-	73.8	77.5	76.6	79.9	85.7	88.1	70.4	74	52.7	58.4	73.9	77.1
multilingual-e5-large	QAE\textsubscript{hyb}, $\alpha=0.15,\;\beta=1.25$	77	80.4	82.1	84.9	89.1	91.1	77.2	80.4	60.3	65	77.6	80.6
gte-multilingual-base	-	65.3	69.9	73.2	76.2	82.9	85.6	62.8	67	52.1	57.8	65.9	69.3
gte-multilingual-base	QAE\textsubscript{hyb}, $\alpha=0.15,\;\beta=1.5$	75.3	79	76.2	79	85.5	88	66.6	70.7	55.8	61.4	73.9	77.2
mcontriever	-	32.8	36.3	40.1	44.2	71.7	75.8	34.7	38.6	26.8	31.4	49.2	53.7
mcontriever	QAE\textsubscript{hyb}, $\alpha=0.45,\;\beta=1.25$	61.2	65.4	68.2	71.9	88.7	90.5	64.5	68.5	50.3	55.6	69.8	73
bce-embedding-base-v1	-	58.9	63.3	-	-	76.8	80.3	-	-	-	-	-	-
bce-embedding-base-v1	QAE\textsubscript{hyb}, $\alpha=0.3,\;\beta=0.5$	66.6	70.6	-	-	85.9	88.1	-	-	-	-	-	-
text2vec-base-multilingual	-	38.5	43	27.7	31.4	12.1	13.7	33.2	37.5	15.3	18.9	12.3	14.6
text2vec-base-multilingual	QAE\textsubscript{emb}, $\alpha=0.75$	55.2	59.3	51.3	54.8	55.3	58.6	49.1	53.8	35.9	40.6	46.7	51

## Sheet: paper data
Model	Param	FIGNEWS(English)		FIGNEWS(Arabic)		CRUD-RAG(Chinese)
		MRR@8	NDCG@8	MRR@8	NDCG@8	MRR@8	NDCG@8
bge-m3	-	74.3	78.2	77.7	80.5	86.8	88.9
	QAE\textsubscript{txt}, $\beta=1.5$	77.1	80.8	80	82.8	89	90.8
multilingual-e5-small	-	70.9	74.7	74	77.1	81.7	84.2
	QAE\textsubscript{hyb}, $\alpha=0.3,\;\beta=0.5$	74.43	78.17	78.78	81.23	87.43	89.22
multilingual-e5-base	-	74.7	77.9	72.2	75.7	86.1	88.1
multilingual-e5-base	QAE\textsubscript{emb}, $\alpha=0.3$	77.4	80.7	77.1	80	88.5	90.5
multilingual-e5-large	-	73.8	77.5	76.6	79.9	85.7	88.1
multilingual-e5-large	QAE\textsubscript{hyb}, $\alpha=0.15,\;\beta=1.25$	77	80.4	82.1	84.9	89.1	91.1
gte-multilingual-base	-	65.3	69.9	73.2	76.2	82.9	85.6
gte-multilingual-base	QAE\textsubscript{hyb}, $\alpha=0.15,\;\beta=1.5$	75.3	79	76.2	79	85.5	88
mcontriever	-	32.8	36.3	40.1	44.2	71.7	75.8
mcontriever	QAE\textsubscript{hyb}, $\alpha=0.45,\;\beta=1.25$	61.2	65.4	68.2	71.9	88.7	90.5
bce-embedding-base-v1	-	58.9	63.3	-	-	76.8	80.3
bce-embedding-base-v1	QAE\textsubscript{hyb}, $\alpha=0.3,\;\beta=0.5$	66.6	70.6	-	-	85.9	88.1
text2vec-base-multilingual	-	38.5	43	27.7	31.4	12.1	13.7
text2vec-base-multilingual	QAE\textsubscript{emb}, $\alpha=0.75$	55.2	59.3	51.3	54.8	55.3	58.6
