# Supplementary material
Source: ML conference proceedings conference paper supplement (https://openreview.net/forum?id=KQsR2JrCwx)
Supplement: supplementary_material [file Experiment2_Ablation.xlsx]

## Sheet: Sheet1
		Model	Param	FIGNEWS(English)		FIGNEWS(Arabic)		FIGNEWS(Crud)		FIGNEWS(French)		FIGNEWS(Hindi)		FIGNEWS(Hebrew)
				MRR@8	NDCG@8	MRR@8	NDCG@8	MRR@8	NDCG@8	MRR@8	NDCG@8	MRR@8	NDCG@8	MRR@8	NDCG@8
		bge-m3	-	74.3	78.2	77.7	80.5	86.8	88.9	73.4	76.9	58.4	63.8	78.6	81
			$\alpha=0.3$	76.23	79.96	80.03	82.64	88.74	90.62	74.99	78.47	60.94	65.85	78.85	81.72
			$\beta=1.5$	77.09	80.79	80.05	82.76	89	90.82	76.72	79.86	62.54	67.51	79.76	82.39
			$\alpha=0.15,\;\beta=1.5$	77.26	80.72	80.57	83.25	89.39	91.16	76.35	79.65	61.49	66.3	79.65	82.38
		multilingual-e5-small	-	70.9	74.7	74	77.1	81.7	84.2	72.8	76.1	66.6	70.1	52.3	57.2
			$\alpha=0.45$	74.58	78.26	76.91	79.63	87.78	89.68	73.52	76.92	57.85	62.7	76.94	79.57
			$\beta=1.0$	73.05	76.87	79.07	81.63	85	87.14	70.42	74.33	58.54	63.28	76.99	79.89
			$\alpha=0.3,\;\beta=0.5$	74.43	78.17	78.78	81.23	87.43	89.22	74.11	77.55	59.43	64.02	77.35	80.09
		multilingual-e5-base	-	74.7	77.9	72.2	75.7	86.1	88.1	70.9	74.3	57.6	62.4	72.6	75.6
			$\alpha=0.3$	77.44	80.72	77.07	79.99	88.54	90.51	76.57	79.81	61.3	65.96	77.68	80.35
			$\beta=0.75$	74.53	78.27	76.21	79.22	87.54	89.6	72.28	76.24	62.26	67.05	76.98	79.73
			$\alpha=0.3,\;\beta=0.5$	76.46	80.13	77.3	80.27	89.03	90.78	75.31	78.89	62.51	67.09	77.11	79.79
		multilingual-e5-large	-	73.8	77.5	76.6	79.9	85.7	88.1	70.4	74	52.7	58.4	73.9	77.1
			$\alpha=0.45$	77.83	81.1	79.72	82.65	89.73	91.42	76.97	79.94	58.16	63.07	78.03	80.94
			$\beta=1.5$	75.58	79	80.7	83.65	88.29	90.41	75.99	79.25	59.73	64.8	76.97	79.69
			$\alpha=0.15,\;\beta=1.25$	77.01	80.4	82.1	84.85	89.11	91.06	77.22	80.42	60.29	65.05	77.6	80.64
		gte-multilingual-base	-	65.3	69.9	73.2	76.2	82.9	85.6	62.8	67	52.1	57.8	65.9	69.3
			$\alpha=0.45$	69.01	73.13	76.8	79.32	87.29	89.36	66.79	70.43	52.85	58.01	72.34	75.55
			$\beta=1.5$	75.52	79.13	75.72	78.45	84.4	87.09	65.94	70.31	56.5	61.81	72.65	76.11
			$\alpha=0.15,\;\beta=1.5$	75.33	78.97	76.19	78.99	85.46	88.01	66.55	70.72	55.8	61.41	73.88	77.22
		mcontriever	-	32.8	36.3	40.1	44.2	71.7	75.8	34.7	38.6	26.8	31.4	49.2	53.7
			$\alpha=0.6$	58.57	63.15	67.06	70.97	88.28	90.11	62.45	66.19	50.16	55.1	69.38	72.47
			$\beta=1.5$	48.65	52.8	59.32	63.33	79.93	83.09	53.69	57.7	44.87	49.63	60.63	64.17
			$\alpha=0.45,\;\beta=1.25$	61.17	65.42	68.23	71.86	88.69	90.5	64.5	68.52	50.32	55.56	69.8	72.99
		bce-embedding-base-v1	-	58.9	63.3	-	-	76.8	80.3	-	-	-	-	-	-
			$\alpha=0.45$	66.6	70.74	-	-	85.19	87.45	-	-	-	-	-	-
			$\beta=1.5$	64.04	68.06	-	-	82.26	84.87	-	-	-	-	-	-
			$\alpha=0.3,\;\beta=0.5$	66.61	70.55	-	-	85.92	88.07	-	-	-	-	-	-
		text2vec-base-multilingual	-	38.5	43	27.7	31.4	12.1	13.7	33.2	37.5	15.3	18.9	12.3	14.6
			$\alpha=0.75$	55.22	59.34	51.27	54.83	55.34	58.6	49.12	53.83	35.9	40.59	46.72	50.96
			$\beta=1.5$	45.99	50.29	35.33	38.82	21.08	23.15	42.94	46.81	21.06	24.42	18.52	21.28
			$\alpha=0.75,\;\beta=0.5$	54.95	59.24	50.19	53.73	57.72	60.43	48.85	53.1	34.22	38.85	46.95	50.93
